# Supplementary material
Source: Springer Nature journal article supplement (http://www.springermedizin.de/resource/supplementary/12891_2007_353_MOESM4_ESM.pdf/9511122)

## Survival of the BioModular® Total Shoulder Prosthesis (1989-1994)

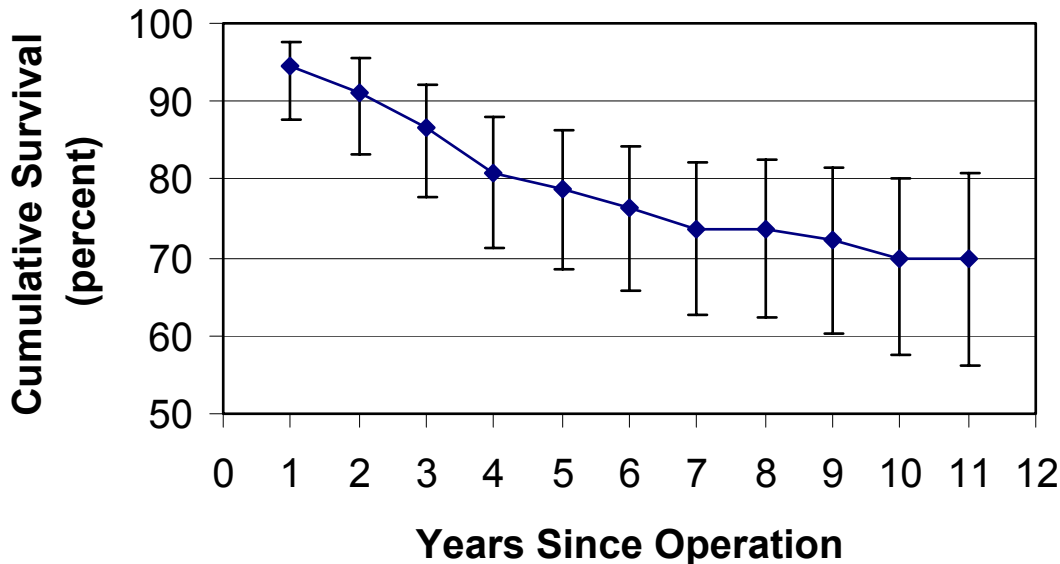

Supplement: MOESM4 [file 9511122]
